# Supplementary material
Source: PubMed Central journal article supplement (PMC3240811)
Supplement: NIHMS326482-supplement-01.pdf [file NIHMS326482-supplement-01.pdf]

## Supplemental Text and Figures

**Figure S1 (related to Figure 1). Characterization of gene expression in ICAM1(+) vs. ICAM1(-) FACS-purified cell populations. (A)** Microarray-based gene expression data for representative genes differentially expressed in FACS-purified ICAM1(+) vs. ICAM1(-) cells. Transcripts known to be expressed in the HBCs (*Krt14*, *Icam1*, *Krt5*, *Itgb4*) were enriched (blue) in the ICAM1-positive cells whereas markers of other cell types – *Ascl1*, *Ngn1* (GBCs); *Gap43* (immature olfactory sensory neurons); *Omp* (mature olfactory sensory neurons) – were depleted (red). Ratio of gene expression is shown both as M-value ( $\log_2[\text{ICAM1}(+)/\text{ICAM1}(-)]$ ) and fold-difference (i.e., the corresponding difference in linear space). **(B)** qRT-PCR analysis of selected marker genes in a pair of ICAM1(+) and ICAM1(-) cell samples obtained from a single FACS purification run. *Ost* is a marker of sustentacular cells. **(C)** qRT-PCR showing that p63 – and specifically  $\Delta Np63$  – is highly enriched in ICAM1(+) vs. ICAM1(-) cells.

**Figure S2. Proliferation of p63(+) cells during injury-induced regeneration (related to Figure 2).** Quantitation of the number of p63(+)/Ki67(+) cells **(A)** and p63 (+) cells **(B)** per 100  $\mu\text{m}$  olfactory epithelium in 12 micron-thick tissue sections, and the percentage of p63(+) cells that are Ki67(+) **(C)**. Olfactory epithelium was analyzed from control, uninjured animals (UI) or from methimazole-treated animals at 1, 2, and 3 days post-injury (dpi). Bars represent mean values +/- standard deviations.

**Figure S3 (related to Figure 3). Additional control experiments for the p63 conditional knockout in regenerating and uninjured olfactory epithelium.** Analysis of *Krt5-CrePR;Rosa26<sup>YFP</sup>* mice in the  $p63^{+/+}$  and  $p63^{lox/+}$ ,  $p63^{lox/lox}$  backgrounds, and in  $p63^{lox/lox}$  animals lacking the *Krt5-crePR* transgene. Olfactory epithelium from these genotypes

was analyzed at different times following methimazole-induced injury as well as in the uninjured steady state. These experiments were conducted to ensure that the observed phenotypes are caused by excision of the  $p63^{lox/lox}$  by cre recombinase expressed under the control of the *Krt5-crePR* transgene, and not due to effects of cre recombinase expression or the unexcised  $p63^{lox}$  allele. **(A-D)** Expression of olfactory cell type-specific markers in heterozygous  $p63^{lox/+}$  mice is similar to that observed in wild type controls, six days after methimazole injury (compare with panels E-H; see also Figure 3). **(E-H)** Olfactory epithelium from  $p63^{lox/lox}$  mice in the absence of cre recombinase (left-hand column) or  $p63^{+/+}$  mice in the presence of cre recombinase (right-hand column) shows normal expression of olfactory cell type-specific markers. **(I-P)** p63 and Krt14 expression was analyzed in olfactory epithelium from mice with the indicated genotypes two days following methimazole treatment. p63- and Krt14-positive cells are reduced in the *Krt5-CrePR;Rosa26<sup>YFP</sup>;p63<sup>lox/lox</sup>* background (O,P), compared to the heterozygous and wild type controls shown in panels I-N. **(Q-T)** In uninjured olfactory epithelium, expression of p63 and Krt14 is indistinguishable between  $p63^{lox/lox}$  mice lacking cre recombinase and *Krt5-CrePR;Rosa26<sup>YFP</sup>;p63<sup>+/+</sup>* animals. Images were captured from the septum in the middle and ventral regions of the olfactory epithelium. Bar = 50 $\mu$ m.

**Figure S4 (related to Figure 5).** The YFP-labeled HBC lineage in uninjured olfactory epithelium from *Krt5-CrePR;Rosa26<sup>YFP</sup>* mice in the  $p63^{+/+}$  and  $p63^{lox/lox}$  backgrounds was assessed for formation of mature olfactory sensory neurons by immunohistochemistry to OMP at P12 and then later at P28. **(A)** Although neurons are formed by P12 in the  $p63^{lox/lox}$  background (see Figure 5), we only rarely observe YFP lineage-traced cells co-labeled with OMP (arrowhead), a marker of fully mature olfactory receptor neurons. We attribute this to the fact that the transgene becomes active at P3 and full maturation

of olfactory neurons from HBCs requires 10-14 days. **(B)** In the occasional *Krt5-CrePR*; *p63<sup>lox/lox</sup>*; *Rosa26<sup>YFP</sup>* animal that survives beyond three weeks of age (here at P28), extensive co-labeling of YFP lineage-traced cells with OMP can be observed, indicating that in the absence of p63, HBCs fully differentiate into mature olfactory sensory neurons. **(C)** Low power view of a coronal section with olfactory epithelium (OE) and olfactory bulb (OB) of a *Krt5-CrePR*; *p63<sup>lox/lox</sup>*; *Rosa26<sup>YFP</sup>* mouse. Note the extensive YFP/OMP co-labeling of sub-mucosal axon fascicles and olfactory nerve processes (arrows) that ultimately innervate the glomerular layer of the olfactory bulb. Images in **(A)** and **(B)** were captured from the septum in the middle and ventral regions of the olfactory epithelium. Bar = 50 $\mu$ m.

**A**

| gene         | M value | p value  | fold difference |
|--------------|---------|----------|-----------------|
| <i>Trp63</i> | 8.27    | 1.57E-06 | 308             |
| <i>Krt14</i> | 8.05    | 1.20E-06 | 265             |
| <i>Icam1</i> | 7.24    | 2.40E-09 | 151             |
| <i>Krt5</i>  | 6.62    | 5.38E-09 | 98.3            |
| <i>Itgb4</i> | 4.74    | 2.41E-07 | 26.7            |
| <i>Ascl1</i> | -3.34   | 5.00E-07 | 0.0987          |
| <i>Omp</i>   | -4.03   | 1.19E-06 | 0.0612          |
| <i>Ngn1</i>  | -4.09   | 2.04E-09 | 0.0587          |
| <i>Gap43</i> | -4.39   | 5.94E-08 | 0.0477          |

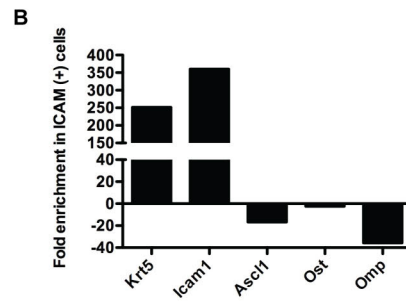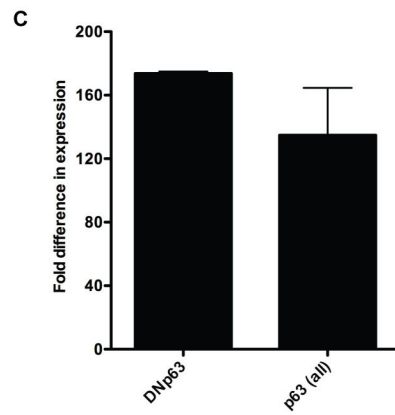

**Figure S1**

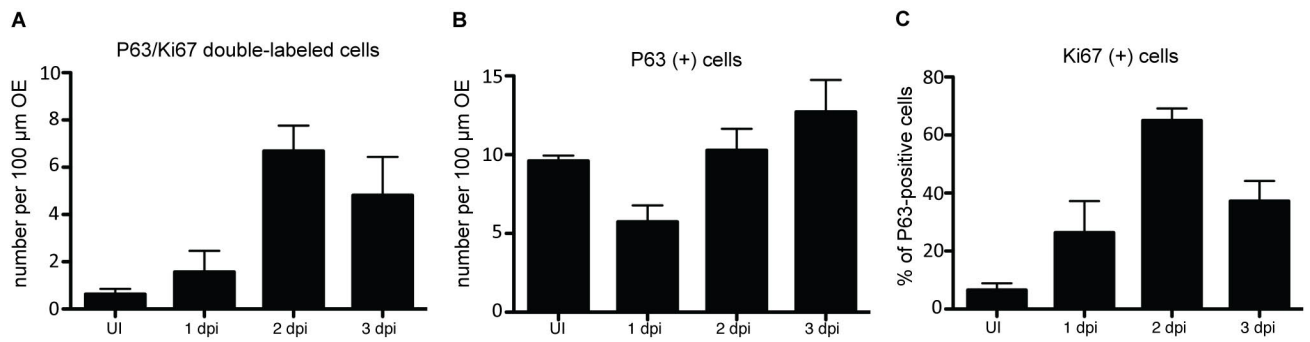

Figure S2

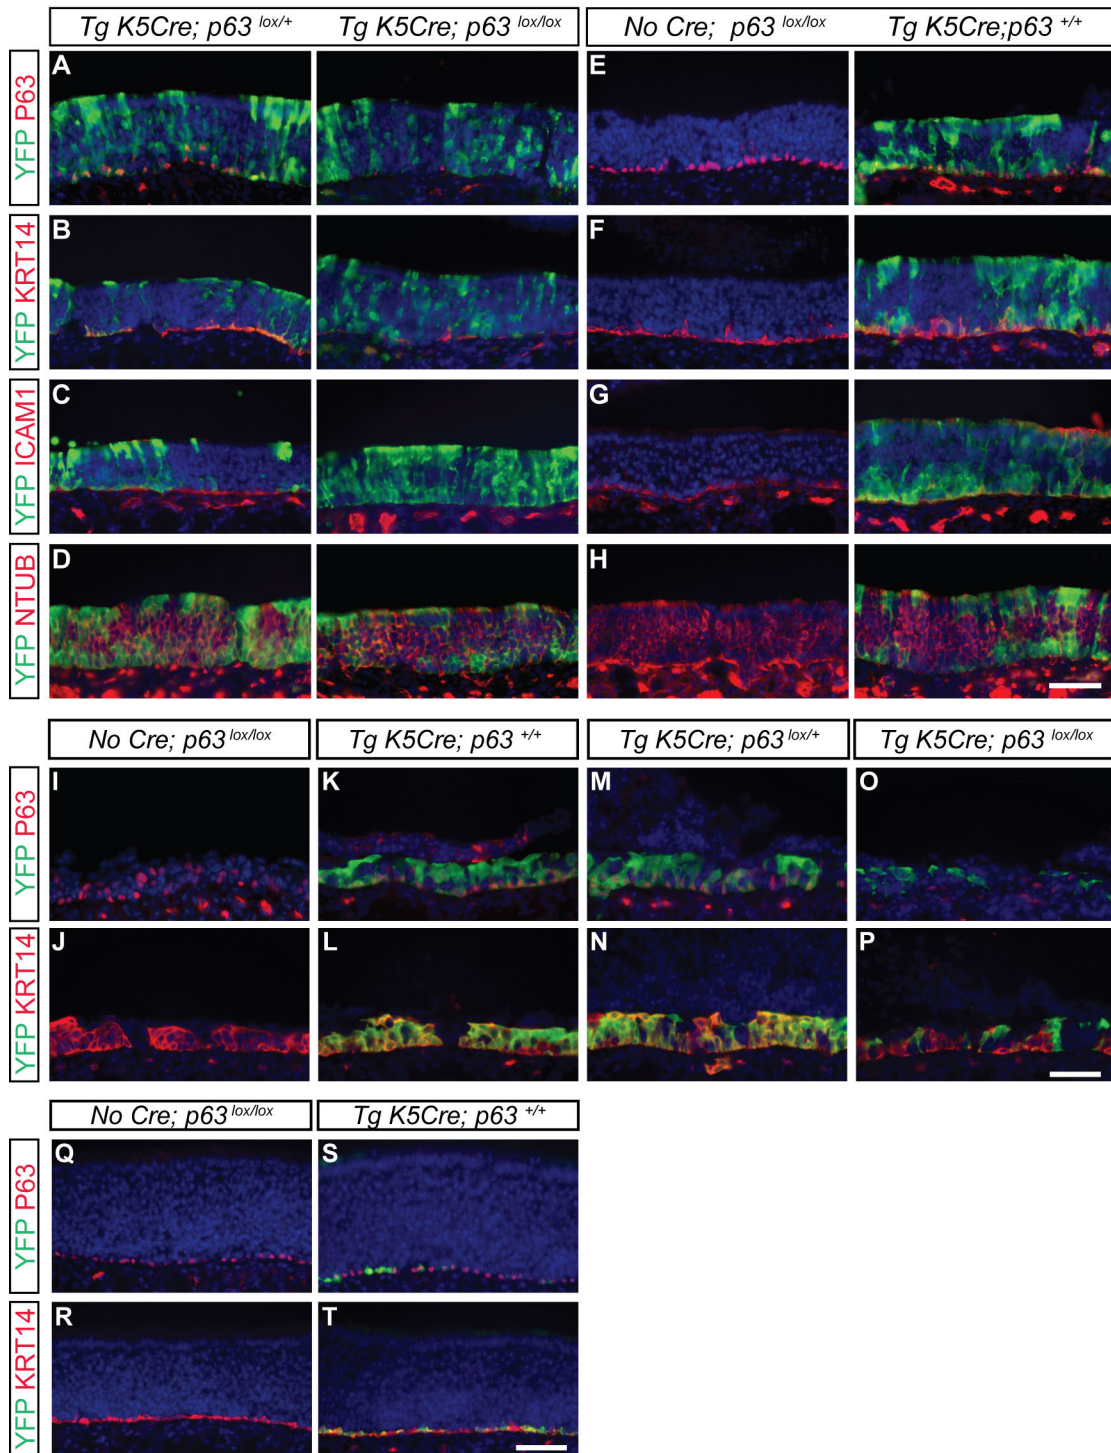

Figure S3

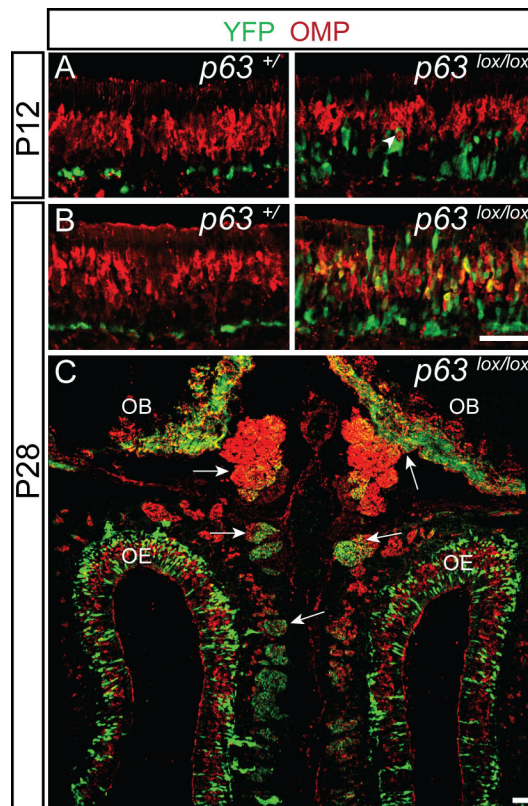

Figure S4
